# Supplementary material for: Conical intersections and intersystem crossings explain product formation in photochemical reactions of aryl azides
Source: Royal Society of Chemistry journal article supplement (doi:10.1039/c8cp06974c), 2019-01-01
Supplement: c8cp06974c1.pdf [file c8cp06974c1.pdf]

# PHYSICAL CHEMISTRY

# CHEMICAL PHYSICS

Electronic Supplementary Information

**Conical Intersections and Intersystem Crossings Explain Product  
Formation in Photochemical Reactions of Aryl Azides**

by

Juan Soto, Juan C. Otero, Francisco J. Avila and Daniel Peláez

## CONTENTS

Table S1 .....Adiabatic excitation energies of 4-methoxyphenyl azide with explicit interaction of one molecule of solvent (acetonitrile) (IPEA = 0.25 au).

Table S2 .....Adiabatic excitation energies of 3-methoxyphenyl azide with explicit interaction of one molecule of solvent (acetonitrile) (IPEA = 0.25 au).

Table S3 .....Adiabatic excitation energies of 4-methoxyphenyl azide with explicit interaction of two molecules of solvent (acetonitrile) (IPEA = 0.25 au).

Table S4 .....Adiabatic excitation energies of 3-methoxyphenyl azide with explicit interaction of two molecules of solvent (acetonitrile) (IPEA = 0.25 au).

Table S5 .....Adiabatic excitation energies of 4-methoxyphenyl azide (IPEA = 0.0 au).

Table S6 .....Adiabatic excitation energies of 3-methoxyphenyl azide (IPEA = 0.0 au).

Table S7 .....Adiabatic excitation energies of 4-methoxyphenyl azide with explicit interaction of one molecule of solvent (acetonitrile) (IPEA = 0.0 au).

Table S8 .....Adiabatic excitation energies of 3-methoxyphenyl azide with explicit interaction of one molecule of solvent (acetonitrile) (IPEA = 0.0 au).

Table S9 .....Adiabatic excitation energies of 4-methoxyphenyl azide with explicit interaction of two molecules of solvent (acetonitrile) (IPEA = 0.0 au).

Table S10 .....Adiabatic excitation energies of 3-methoxyphenyl azide with explicit interaction of two molecules of solvent (acetonitrile) (IPEA = 0.0 au).

Fig. S1 ..... Expanded view of the critical region of the potential energy surfaces (Fig. 3).

Table S11 .....CAS-SCF internal coordinates of the conical intersections on the potential energy surfaces of 4-methoxyphenyl azide.

Table S12. ....CAS-SCF internal coordinates of the conical intersections on the potential energy surfaces of 3-methoxyphenyl azide.

Table S13. ....CAS-SCF internal coordinates of the minimum energy intersystem crossings on the potential energy surfaces of 4-methoxyphenyl azide.

Table S14. ....CAS-SCF internal coordinates of the minimum energy intersystem crossings on the potential energy surfaces of 3-methoxyphenyl azide.

Table S15. ....Relative energies (eV) of the critical points (conical intersections and intersystem crossings) in the photochemistry of 3- and 4-methoxyphenyl azide ( $C_s$ , MS-CASPT2 IPEA=0.25 and IPEA=0.0 a.u).

**TableS1.** Adiabatic excitation energies in eV of the singlet states of 4-methoxyphenyl azide ( $C_s$ , MS-CASPT2, IPEA=0.25) with explicit interaction of one molecule of solvent (acetonitrile).<sup>a,b</sup>

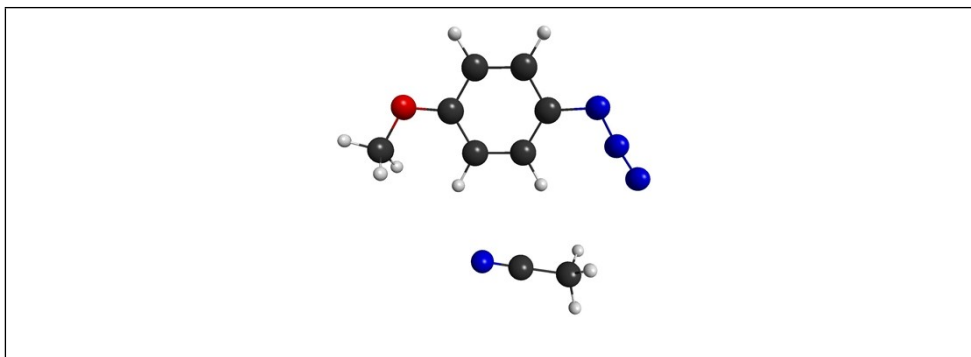

| <i>Transition</i> | $\Delta E$ | <i>TDM</i> <sup>c</sup> | <i>Configuration</i> <sup>d</sup>                                                                                                                        |
|-------------------|------------|-------------------------|----------------------------------------------------------------------------------------------------------------------------------------------------------|
| 1A'→2A'           | 4.38       | 1.042 75                | 26% $\pi_3(\text{ring})^1\pi_3^*(\text{ring})^1$<br>24% $\pi_3(\text{ring})^1\pi_2^*(\text{ring})^1$<br>15% $\pi_2(\text{ring})^1\pi_3^*(\text{ring})^1$ |
| 1A'→3A'           | 4.91       | 1.547 42                | 44% $\pi_3(\text{ring})^1\pi_3^*(\text{ring})^1$                                                                                                         |
| 1A'→4A'           | 6.65       | 0.358 38                | 24% $\pi_3(\text{ring})^0\pi_3^*(\text{ring})^2$<br>19% $n_\pi(\text{NN})^1\pi_3^*(\text{ring})^1$                                                       |
| 1A'→1A''          | 3.67       | 0.074 34                | 79% $\pi_3(\text{ring})^1\pi_\sigma^*(\text{NN})^1$                                                                                                      |
| 1A'→2A''          | 6.10       | 0.010 55                | 41% $\pi_2(\text{ring})^1\pi_\sigma^*(\text{NN})^1$<br>21% $n_\pi(\text{NN})^1\pi_\sigma^*(\text{NN})^1$                                                 |
| 1A'→3A''          | 6.29       | 0.017 44                | 22% $\pi_2(\text{ring})^1\pi_\sigma^*(\text{NN})^1$<br>40% $n_\pi(\text{NN})^1\pi_\sigma^*(\text{NN})^1$                                                 |
| 1A'→4A''          | 8.05       | 0.007 09                | 55% $\pi_\sigma^*(\text{NN})^1\pi_2(\text{ring})^1\pi_3(\text{ring})^1\pi_2^*(\text{ring})^1$                                                            |

<sup>a</sup>MP2/aug-cc-pDVZ optimized geometry ( $C_s$  symmetry). <sup>b</sup>CAS-SCF wavefunction including four roots in each symmetry block. IPEA=0.25, imaginary shift = 0.1. <sup>c</sup>Transition dipole moment (position operator) in atomic units. <sup>d</sup>MS-CASPT2 main electronic configurations of the excited states referred to the ground state configuration (see text). Only contributions with weight greater than 15% are included.

**Table S2.** Adiabatic excitation energies in eV of the singlet states of 3-methoxyphenyl azide ( $C_s$ , MS-CASPT2, IPEA=0.25) with explicit interaction of one molecule of solvent (acetonitrile).<sup>a,b</sup>

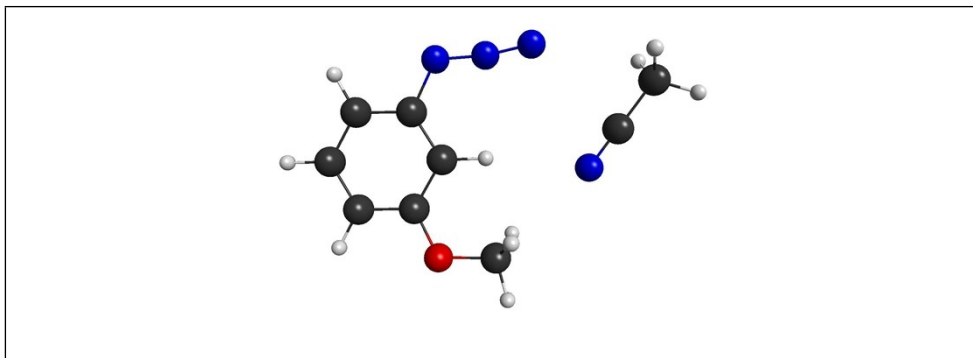

| <i>Transition</i> | $\Delta E$ | <i>TDM</i> <sup>c</sup> | <i>Configuration</i> <sup>d</sup>                                                                    |
|-------------------|------------|-------------------------|------------------------------------------------------------------------------------------------------|
| 1A' → 2A'         | 4.44       | 1.367 93                | 32% $\pi_3(\text{ring})^1\pi_3^*(\text{ring})^1$                                                     |
| 1A' → 3A'         | 5.03       | 1.430 08                | 35% $\pi_3(\text{ring})^1\pi_3^*(\text{ring})^1$<br>24% $\pi_2(\text{ring})^1\pi_3^*(\text{ring})^1$ |
| 1A' → 4A'         | 6.53       | 0.164 71                | 21% $n_\pi(\text{NN})^1\pi_3^*(\text{ring})^1$<br>35% $\pi_3(\text{ring})^0\pi_3^*(\text{ring})^2$   |
| 1A' → 1A''        | 3.77       | 0.068 87                | 77% $\pi_3(\text{ring})^1\pi_\sigma^*(\text{NN})^1$                                                  |
| 1A' → 2A''        | 5.57       | 0.011 94                | 69% $\pi_2(\text{ring})^1\pi_\sigma^*(\text{NN})^1$                                                  |
| 1A' → 3A''        | 6.37       | 0.014 86                | 57% $n_\pi(\text{NN})^1\pi_\sigma^*(\text{NN})^1$                                                    |
| 1A' → 4A''        | 8.05       | 0.008 89                | 36% $\pi_\sigma^*(\text{NN})^1\pi_2(\text{ring})^1\pi_3(\text{ring})^1\pi_2^*(\text{ring})^1$        |

<sup>a</sup>MP2/aug-cc-pDVZ optimized geometry ( $C_s$  symmetry). <sup>b</sup>CAS-SCF wavefunction including four roots in each symmetry block. IPEA=0.25, imaginary shift = 0.1. <sup>c</sup>Transition dipole moment (position operator) in atomic units. <sup>d</sup>MS-CASPT2 main electronic configurations of the excited states referred to the ground state configuration (see text). Only contributions with weight greater than 15% are included.

**Table S3.** Adiabatic excitation energies in eV of the singlet states of 4-methoxyphenyl azide ( $C_s$ , MS-CASPT2, IPEA=0.25) with explicit interaction of two molecules of solvent (acetonitrile).<sup>a,b</sup>

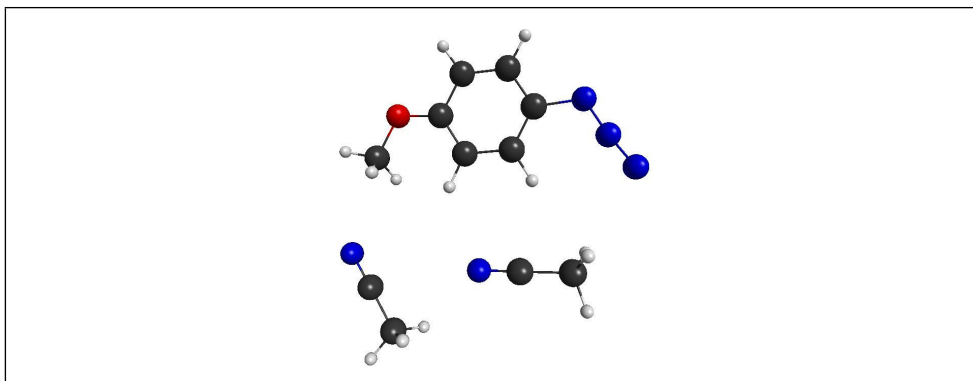

| <i>Transition</i>      | $\Delta E$ | <i>TDM</i> <sup>c</sup> | <i>Configuration</i> <sup>d</sup>                                                                                                                        |
|------------------------|------------|-------------------------|----------------------------------------------------------------------------------------------------------------------------------------------------------|
| $1A' \rightarrow 2A'$  | 4.34       | 1.130 82                | 30% $\pi_3(\text{ring})^1\pi_3^*(\text{ring})^1$<br>22% $\pi_3(\text{ring})^1\pi_2^*(\text{ring})$                                                       |
| $1A' \rightarrow 3A'$  | 4.86       | 1.493 65                | 40% $\pi_3(\text{ring})^1\pi_3^*(\text{ring})^1$                                                                                                         |
| $1A' \rightarrow 4A'$  | 6.63       | 0.388 67                | 18% $n_\pi(\text{NN})^1\pi_3^*(\text{ring})^1$<br>24% $\pi_3(\text{ring})^0\pi_3^*(\text{ring})^2$                                                       |
| $1A' \rightarrow 1A''$ | 3.62       | 0.073 81                | 79% $\pi_3(\text{ring})^1\pi_{\sigma^*}(\text{NN})^1$                                                                                                    |
| $1A' \rightarrow 2A''$ | 6.02       | 0.012 83                | 39% $\pi_2(\text{ring})^1\pi_{\sigma^*}(\text{NN})^1$<br>24% $n_\pi(\text{NN})^1\pi_{\sigma^*}(\text{NN})^1$                                             |
| $1A' \rightarrow 3A''$ | 6.21       | 0.018 25                | 25% $\pi_2(\text{ring})^1\pi_{\sigma^*}(\text{NN})^1$<br>39% $n_\pi(\text{NN})^1\pi_{\sigma^*}(\text{NN})^1$                                             |
| $1A' \rightarrow 4A''$ | 7.99       | 0.007 46                | 54% $\pi_{\sigma^*}(\text{NN})^1\pi_2(\text{ring})^1\pi_3(\text{ring})^1\pi_2^*(\text{ring})^1$<br>18% $\pi_{\sigma^*}(\text{NN})^1\pi_1(\text{ring})^1$ |

<sup>a</sup>MP2/aug-cc-pDVZ optimized geometry ( $C_s$  symmetry). <sup>b</sup>CAS-SCF wavefunction including four roots in each symmetry block. IPEA=0.25, imaginary shift = 0.1. <sup>c</sup>Transition dipole moment (position operator) in atomic units. <sup>d</sup>MS-CASPT2 main electronic configurations of the excited states referred to the ground state configuration (see text). Only contributions with weight greater than 15% are included.

**Table S4.** Adiabatic excitation energies in eV of the singlet states of 3-methoxyphenyl azide ( $C_s$ , MS-CASPT2, IPEA=0.25) with explicit interaction of two molecules of solvent (acetonitrile).<sup>a,b</sup>

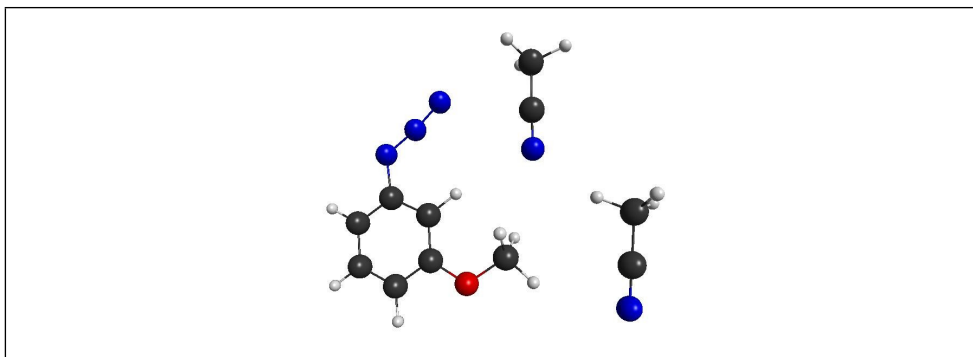

| <i>Transition</i> | $\Delta E$ | <i>TDM</i> <sup>c</sup> | <i>Configuration</i> <sup>d</sup>                                                                                                                    |
|-------------------|------------|-------------------------|------------------------------------------------------------------------------------------------------------------------------------------------------|
| 1A'→2A'           | 4.43       | 1.394 95                | 34% $\pi_3(\text{ring})^1\pi_3^*(\text{ring})^1$                                                                                                     |
| 1A'→3A'           | 5.02       | 1.372 61                | 33% $\pi_3(\text{ring})^1\pi_3^*(\text{ring})^1$<br>23% $\pi_2(\text{ring})^1\pi_3^*(\text{ring})^1$                                                 |
| 1A'→4A'           | 6.53       | 0.180 71                | 21% $n_\pi(\text{NN})^1\pi_3^*(\text{ring})^1$<br>25% $\pi_3(\text{ring})^0\pi_3^*(\text{ring})^2$                                                   |
| 1A'→1A''          | 3.74       | 0.068 96                | 77% $\pi_3(\text{ring})^1\pi_\sigma^*(\text{NN})^1$                                                                                                  |
| 1A'→2A''          | 5.49       | 0.013 12                | 70% $\pi_2(\text{ring})^1\pi_\sigma^*(\text{NN})^1$                                                                                                  |
| 1A'→3A''          | 6.31       | 0.015 46                | 57% $n_\pi(\text{NN})^1\pi_\sigma^*(\text{NN})^1$                                                                                                    |
| 1A'→4A''          | 8.02       | 0.009 06                | 36% $\pi_\sigma^*(\text{NN})^1\pi_2(\text{ring})^1\pi_3(\text{ring})^1\pi_2^*(\text{ring})^1$<br>18% $\pi_\sigma^*(\text{NN})^1\pi_1(\text{ring})^1$ |

<sup>a</sup>MP2/aug-cc-pDVZ optimized geometry ( $C_s$  symmetry). <sup>b</sup>CAS-SCF wavefunction including four roots in each symmetry block. IPEA=0.25, imaginary shift = 0.1. <sup>c</sup>Transition dipole moment (position operator) in atomic units. <sup>d</sup>MS-CASPT2 main electronic configurations of the excited states referred to the ground state configuration (see text). Only contributions with weight greater than 15% are included.

**Table S5.** Adiabatic excitation energies in eV of the singlet states of isolated 4-methoxyphenyl azide ( $C_s$ , MS-CASPT2, IPEA=0.0).<sup>a,b</sup>

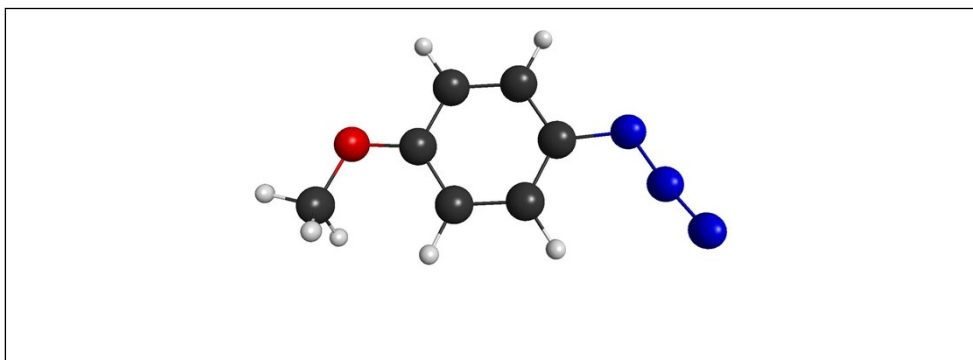

| <i>Transition</i> | $\Delta E$ | <i>TDM</i> <sup>c</sup> | <i>Configuration</i> <sup>d</sup>                                                                                                                        |
|-------------------|------------|-------------------------|----------------------------------------------------------------------------------------------------------------------------------------------------------|
| 1A' → 2A'         | 3.92       | 1.039 42                | 26% $\pi_3(\text{ring})^1\pi_2^*(\text{ring})^1$<br>15% $\pi_2(\text{ring})^1\pi_3^*(\text{ring})^1$<br>24% $\pi_3(\text{ring})^1\pi_3^*(\text{ring})^1$ |
| 1A' → 3A'         | 4.50       | 1.644 80                | 47% $\pi_3(\text{ring})^1\pi_3^*(\text{ring})^1$                                                                                                         |
| 1A' → 4A'         | 6.19       | 0.214 38                | 15% $n_\pi(\text{NN})^1\pi_3^*(\text{ring})^1$<br>24% $\pi_3(\text{ring})^0\pi_3^*(\text{ring})^2$<br>15% $\pi_3(\text{ring})^1\pi^*(\text{NNN})^1$      |
| 1A' → 1A''        | 3.51       | 0.074 30                | 79% $\pi_3(\text{ring})^1\pi_3^*(\text{NN})^1$                                                                                                           |
| 1A' → 2A''        | 5.83       | 0.010 50                | 33% $\pi_2(\text{ring})^1\pi_\sigma^*(\text{NN})^1$<br>26% $n_\pi(\text{NN})^1\pi_\sigma^*(\text{NN})^1$                                                 |
| 1A' → 3A''        | 6.12       | 0.012 74                | 26% $\pi_2(\text{ring})^1\pi_\sigma^*(\text{NN})^1$<br>32% $n_\pi(\text{NN})^1\pi_\sigma^*(\text{NN})^1$                                                 |
| 1A' → 4A''        | 7.65       | 0.007 89                | 56% $\pi_2(\text{ring})^1\pi_3(\text{ring})^1\pi_2^*(\text{ring})^1\pi_\sigma^*(\text{NN})^1$                                                            |

<sup>a</sup> $C_s$  MP2/aug-cc-pDVZ optimized geometry <sup>b</sup>CAS-SCF wavefunction including four roots state average CAS-SCF wavefunctions ( $C_s$  symmetry). (IPEA=0), (Imaginary shift = 0.1). <sup>c</sup>Transition dipole moment (position operator). <sup>d</sup>MS-CASPT2 main electronic configurations of the excited states referred to the ground state configuration (see text). Only contributions with weight greater than 15% are included.



**Table S6.** Gas phase adiabatic excitation energies in eV of the singlet states of 3-methoxyphenyl azide ( $C_s$ , MS-CASPT2, IPEA=0.0).<sup>a,b</sup>

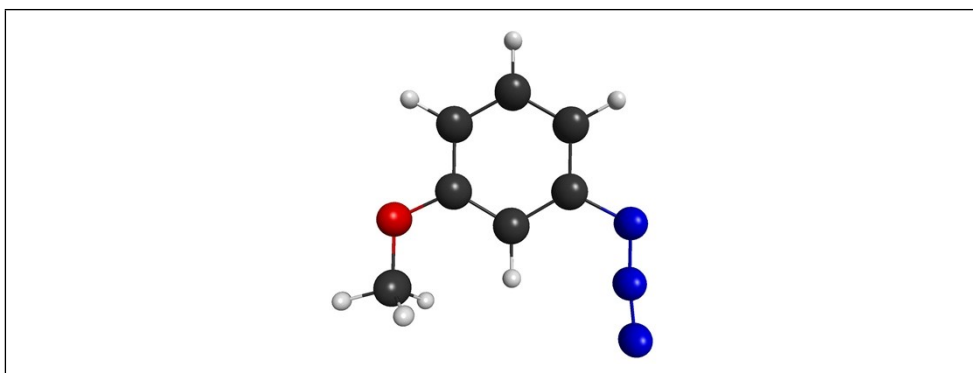

| <i>Transition</i> | $\Delta E$ | <i>TDM</i> <sup>c</sup> | <i>Configuration</i> <sup>d</sup>                                                                                                                    |
|-------------------|------------|-------------------------|------------------------------------------------------------------------------------------------------------------------------------------------------|
| 1A'→ 2A'          | 4.02       | 1.413 27                | 35% $\pi_3(\text{ring})^1\pi_3^*(\text{ring})^1$                                                                                                     |
| 1A'→ 3A'          | 4.68       | 1.375 34                | 32% $\pi_3(\text{ring})^1\pi_3^*(\text{ring})^1$<br>25% $\pi_2(\text{ring})^1\pi_3^*(\text{ring})^1$                                                 |
| 1A'→ 4A'          | 6.18       | 0.028 48                | 25% $n_\pi(\text{NN})^1\pi_3^*(\text{ring})^1$<br>20% $\pi_3(\text{ring})^0\pi_3^*(\text{ring})^2$                                                   |
| 1A'→ 1A''         | 3.62       | 0.072 94                | 77% $\pi_3(\text{ring})^1\pi_\sigma^*(\text{NN})^1$                                                                                                  |
| 1A'→ 2A''         | 5.41       | 0.016 35                | 68% $\pi_2(\text{ring})^1\pi_\sigma^*(\text{NN})^1$                                                                                                  |
| 1A'→ 3A''         | 6.09       | 0.012 89                | 56% $n_\pi(\text{NN})^1\pi_\sigma^*(\text{NN})^1$                                                                                                    |
| 1A'→ 4A''         | 7.59       | 0.009 13                | 15% $\pi_1(\text{ring})^1\pi_\sigma^*(\text{NN})^1$<br>30% $\pi_2(\text{ring})^1\pi_3(\text{ring})^1\pi_2^*(\text{ring})^1\pi_\sigma^*(\text{NN})^1$ |

<sup>a</sup> $C_s$  MP2/aug-cc-pDVZ optimized geometry. <sup>b</sup>CAS-SCF wavefunction including four roots state average CAS-SCF wavefunctions ( $C_s$  symmetry). (IPEA=0.0), (Imaginary shift = 0.1). <sup>c</sup>Transition dipole moment (position operator) in atomic units. <sup>d</sup>MS-CASPT2 main electronic configurations of the excited states referred to the ground state configuration (see text). Only contributions with weight greater than 15% are included.

**Table S7.** Adiabatic excitation energies in eV of the singlet states of 4-methoxyphenyl azide ( $C_s$ , MS-CASPT2, IPEA=0.0) with explicit interaction of one molecule of solvent (acetonitrile).<sup>a,b</sup>

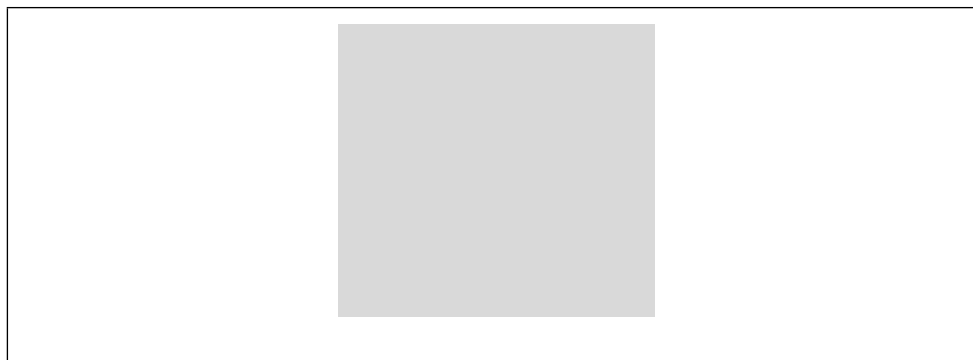

| Transition | $\Delta E$ | $TDM^c$  | <i>Configuration</i> <sup>d</sup>                                                                        |
|------------|------------|----------|----------------------------------------------------------------------------------------------------------|
| 1A'→2A'    | 3.89       | 1.246 94 | 35% $\pi_3(\text{ring})^1\pi_3^*(\text{ring})^1$<br>19% $\pi_3(\text{ring})^1\pi_2^*(\text{ring})^1$     |
| 1A'→3A'    | 4.41       | 1.408 31 | 34% $\pi_3(\text{ring})^1\pi_3^*(\text{ring})^1$<br>17% $\pi_3(\text{ring})^1\pi_2^*(\text{ring})^1$     |
| 1A'→4A'    | 6.23       | 0.241 53 | 18% $n_\pi(\text{NN})^1\pi_3^*(\text{ring})^1$<br>24% $\pi_3(\text{ring})^0\pi_3^*(\text{ring})^2$       |
| 1A'→1A''   | 3.34       | 0.072 14 | 79% $\pi_3(\text{ring})^1\pi_\sigma^*(\text{NN})^1$                                                      |
| 1A'→2A''   | 5.58       | 0.009 64 | 44% $\pi_2(\text{ring})^1\pi_\sigma^*(\text{NN})^1$<br>19% $n_\pi(\text{NN})^1\pi_\sigma^*(\text{NN})^1$ |
| 1A'→3A''   | 5.81       | 0.018 15 | 20% $\pi_2(\text{ring})^1\pi_\sigma^*(\text{NN})^1$<br>43% $n_\pi(\text{NN})^1\pi_\sigma^*(\text{NN})^1$ |
| 1A'→4A''   | 7.44       | 0.008 21 | 55% $\pi_\sigma^*(\text{NN})^1\pi_2(\text{ring})^1\pi_3(\text{ring})^1\pi_2^*(\text{ring})^1$            |

<sup>a</sup> $C_s$  MP2/aug-cc-pVDZ optimized geometry. <sup>b</sup>CAS-SCF wavefunction including four roots in each symmetry block (IPEA=0), (Imaginary shift = 0.1). <sup>c</sup>Transition dipole moment (position operator). <sup>d</sup>MS-CASPT2 main electron configurations of the excited states referred to the ground state configuration (see text). Only contributions with weight greater than 15% are included.

**Table S8.** Adiabatic excitation energies in eV of the singlet states of 3-methoxyphenyl azide ( $C_s$ , MS-CASPT2, IPEA=0.0) with explicit interaction of one molecule of solvent (acetonitrile).<sup>a,b</sup>

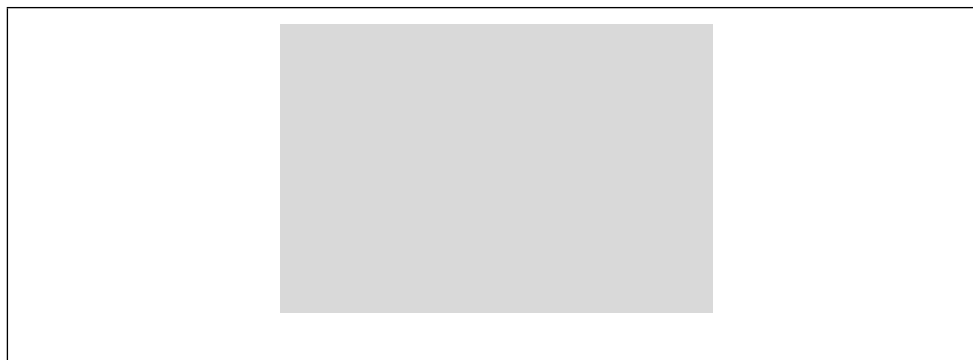

| Transition | $\Delta E$ | $TDM^c$  | <i>Configuration</i> <sup>d</sup>                                                                    |
|------------|------------|----------|------------------------------------------------------------------------------------------------------|
| 1A' → 2A'  | 3.97       | 1.508 85 | 39% $\pi_3(\text{ring})^1\pi_3^*(\text{ring})^1$                                                     |
| 1A' → 3A'  | 4.57       | 1.290 94 | 28% $\pi_3(\text{ring})^1\pi_3^*(\text{ring})^1$<br>27% $\pi_2(\text{ring})^1\pi_3^*(\text{ring})^1$ |
| 1A' → 4A'  | 6.16       | 0.048 55 | 25% $n_\pi(\text{NN})^1\pi_3^*(\text{ring})^1$<br>21% $\pi_3(\text{ring})^0\pi_3^*(\text{ring})^2$   |
| 1A' → 1A'' | 3.52       | 0.068 63 | 77% $\pi_3(\text{ring})^1\pi_\sigma^*(\text{NN})^1$                                                  |
| 1A' → 2A'' | 5.19       | 0.012 18 | 70% $\pi_2(\text{ring})^1\pi_\sigma^*(\text{NN})^1$                                                  |
| 1A' → 3A'' | 5.92       | 0.015 28 | 58% $n_\pi(\text{NN})^1\pi_\sigma^*(\text{NN})^1$                                                    |
| 1A' → 4A'' | 7.47       | 0.009 27 | 54% $\pi_\sigma^*(\text{NN})^1\pi_2(\text{ring})^1\pi_3(\text{ring})^1\pi_2^*(\text{ring})$          |

<sup>a</sup> $C_s$  MP2/aug-cc-pVDZ optimized geometry. <sup>b</sup>CAS-SCF wavefunction including four roots in each symmetry block (IPEA=0), (Imaginary shift = 0.1). <sup>c</sup>Transition dipole moment (position operator). <sup>d</sup>MS-CASPT2 electronic configurations of the excited states referred to the ground state configuration (see text). Only contributions with weight greater than 15% are included.

**Table S9.** Adiabatic excitation energies in eV of the singlet states of 4-methoxyphenyl azide ( $C_s$ , MS-CASPT2, IPEA=0.0) with explicit interaction of two molecules of solvent (acetonitrile).<sup>a,b</sup>

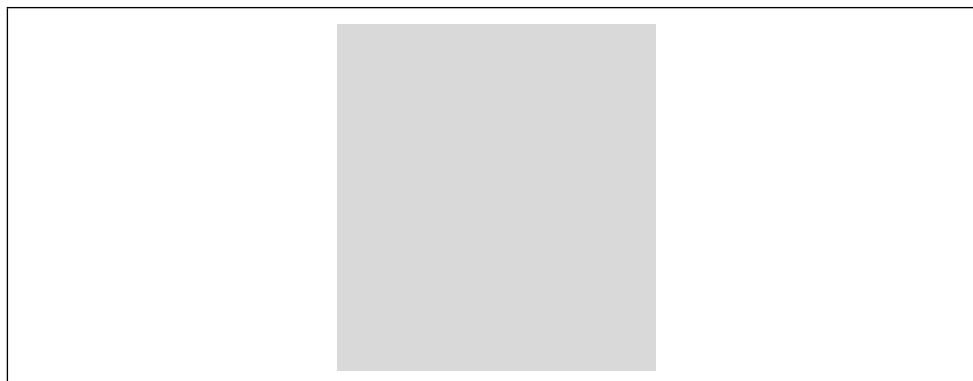

| <i>Transition</i> | $\Delta E$ | <i>TDM</i> <sup>c</sup> | <i>Configuration</i> <sup>d</sup>                                                                                                                    |
|-------------------|------------|-------------------------|------------------------------------------------------------------------------------------------------------------------------------------------------|
| 1A'→2A'           | 3.89       | 1.239 96                | 35% $\pi_3(\text{ring})^1\pi_3^*(\text{ring})^1$<br>20% $\pi_3(\text{ring})^1\pi_2^*(\text{ring})$                                                   |
| 1A'→3A'           | 4.42       | 1. 419 43               | 35% $\pi_3(\text{ring})^1\pi_3^*(\text{ring})^1$                                                                                                     |
| 1A'→4A'           | 6.22       | 0.251 24                | 18% $n_\pi(\text{NN})^1\pi_3^*(\text{ring})^1$<br>24% $\pi_3(\text{ring})^0\pi_3^*(\text{ring})^2$                                                   |
| 1A'→1A''          | 3.39       | 0.073 95                | 79% $\pi_3(\text{ring})^1\pi_\sigma^*(\text{NN})^1$                                                                                                  |
| 1A'→2A''          | 5.64       | 0.011 55                | 40% $\pi_2(\text{ring})^1\pi_\sigma^*(\text{NN})^1$<br>23% $n_\pi(\text{NN})^1\pi_\sigma^*(\text{NN})^1$                                             |
| 1A'→3A''          | 5.86       | 0.018 21                | 24% $\pi_2(\text{ring})^1\pi_\sigma^*(\text{NN})^1$<br>40% $n_\pi(\text{NN})^1\pi_\sigma^*(\text{NN})^1$                                             |
| 1A'→4A''          | 7.49       | 0.007 78                | 55% $\pi_\sigma^*(\text{NN})^1\pi_2(\text{ring})^1\pi_3(\text{ring})^1\pi_2^*(\text{ring})^1$<br>13% $\pi_\sigma^*(\text{NN})^1\pi_1(\text{ring})^1$ |

<sup>a</sup>MP2/aug-cc-pDVZ optimized geometry ( $C_s$  symmetry). <sup>b</sup>CAS-SCF wavefunction including four roots in each symmetry block. IPEA=0.0, imaginary shift = 0.1. <sup>c</sup>Transition dipole moment (position operator) in atomic units. <sup>d</sup>MS-CASPT2 main electronic configurations of the excited states referred to the ground state configuration (see text). Only contributions with weight greater than 15% are included.

**Table S10.** Adiabatic excitation energies in eV of the singlet states of 3-methoxyphenyl azide ( $C_s$ , MS-CASPT2, IPEA=0.0) with explicit interaction of two molecules of solvent (acetonitrile).<sup>a,b</sup>

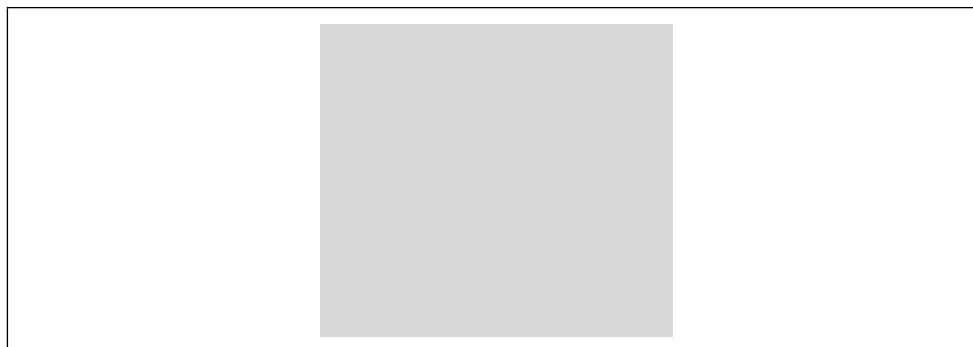

| <i>Transition</i> | $\Delta E$ | <i>TDM</i> <sup>c</sup> | <i>Configuration</i> <sup>d</sup>                                                                                                                    |
|-------------------|------------|-------------------------|------------------------------------------------------------------------------------------------------------------------------------------------------|
| 1A'→2A'           | 3.97       | 1.508 85                | 39% $\pi_3(\text{ring})^1\pi_3^*(\text{ring})^1$                                                                                                     |
| 1A'→3A'           | 4.56       | 1. 290 94               | 28% $\pi_3(\text{ring})^1\pi_3^*(\text{ring})^1$<br>27% $\pi_2(\text{ring})^1\pi_3^*(\text{ring})^1$                                                 |
| 1A'→4A'           | 6.26       | 0.048 55                | 21% $n_\pi(\text{NN})^1\pi_3^*(\text{ring})^1$<br>25% $\pi_3(\text{ring})^0\pi_3^*(\text{ring})^2$                                                   |
| 1A'→1A''          | 3.51       | 0.068 63                | 77% $\pi_3(\text{ring})^1\pi_\sigma^*(\text{NN})^1$                                                                                                  |
| 1A'→2A''          | 5.18       | 0.012 18                | 70% $\pi_2(\text{ring})^1\pi_\sigma^*(\text{NN})^1$                                                                                                  |
| 1A'→3A''          | 5.92       | 0.015 28                | 57% $n_\pi(\text{NN})^1\pi_\sigma^*(\text{NN})^1$                                                                                                    |
| 1A'→4A''          | 7.44       | 0.009 27                | 36% $\pi_\sigma^*(\text{NN})^1\pi_2(\text{ring})^1\pi_3(\text{ring})^1\pi_2^*(\text{ring})^1$<br>17% $\pi_\sigma^*(\text{NN})^1\pi_1(\text{ring})^1$ |

<sup>a</sup>MP2/aug-cc-pDVZ optimized geometry ( $C_s$  symmetry). <sup>b</sup>CAS-SCF wavefunction including four roots in each symmetry block. IPEA=0.0, imaginary shift = 0.1. <sup>c</sup>Transition dipole moment (position operator) in atomic units. <sup>d</sup>MS-CASPT2 main electronic configurations of the excited states referred to the ground state configuration (see text). Only contributions with weight greater than 15% are included.

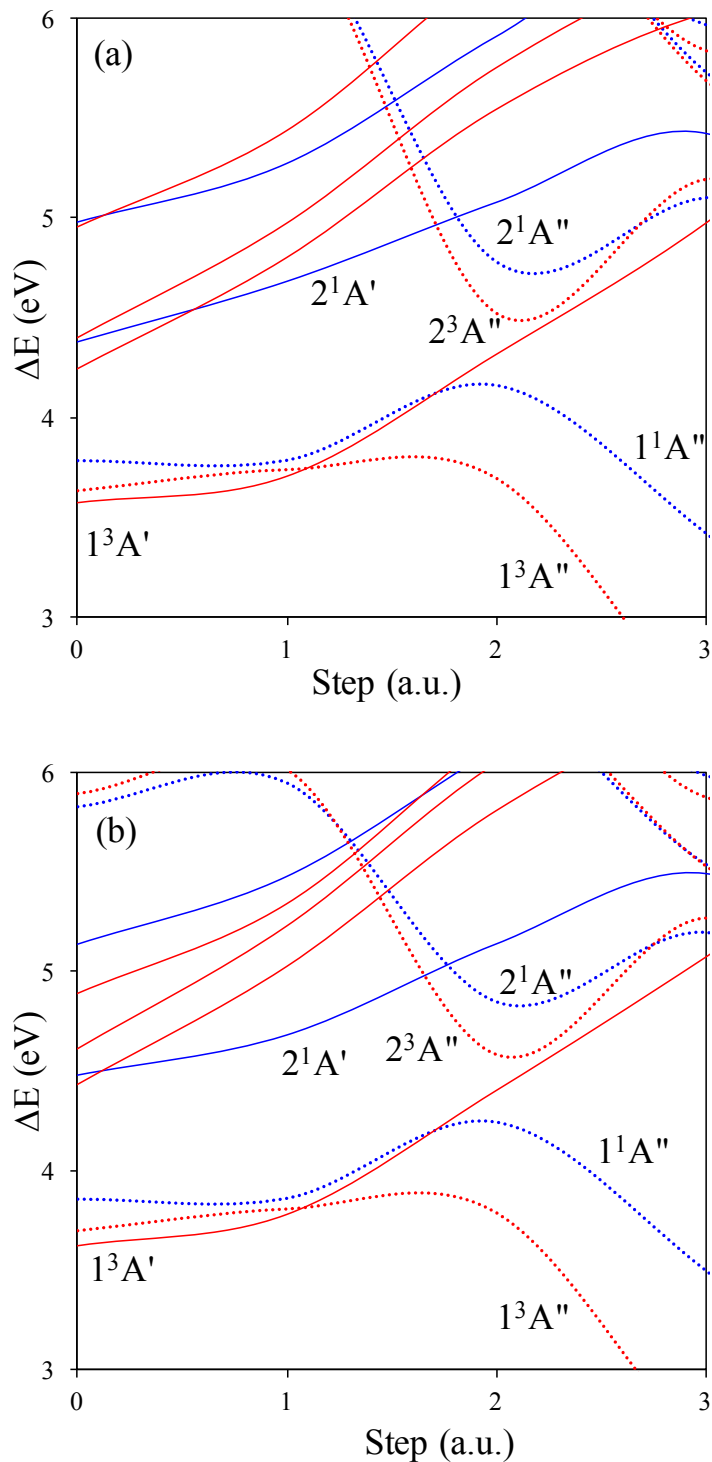

**Fig. S1.** Expanded view of the critical region of the potential energy surfaces (Fig. 3). MS-CASPT2/ANO-RCC[4s3p2d1f/3s2p1d] ( $C_s$  symmetry) potential energy curves of the ground and low-lying singlet and triplet excited states for dissociation into methoxyphenyl nitrene and  $N_2$ , (a) 4-methoxyphenyl azide and (b) 3-methoxyphenyl azide. SA-CASSCF reference wavefunction. Blue solid line: singlet A'; red solid line: triplet A'; blue dotted line: singlet A''; red dotted line: triplet A''. Reference geometry: MP2/aug-cc-pVDZ.

**Table S11.** CAS-SCF internal coordinates of the conical intersections on the potential energy surfaces of 4-methoxyphenyl azide.<sup>a</sup>

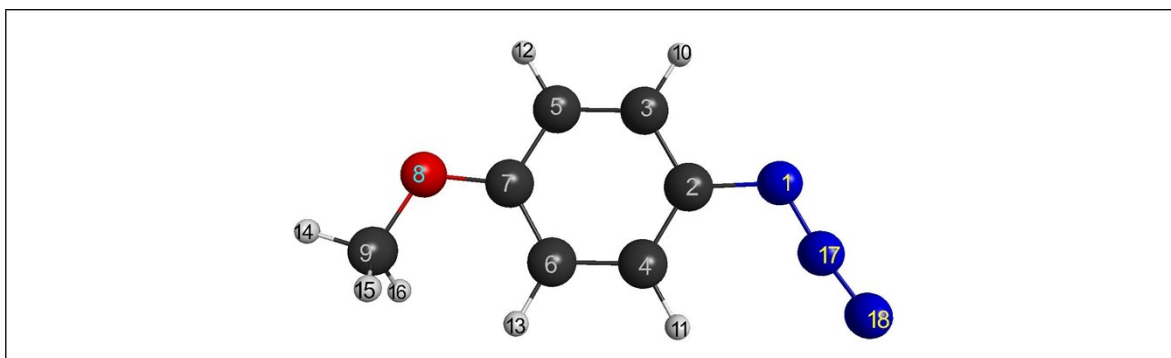

| Coordinate | 4M1 <sup>c</sup>  | 4CI0                                 | 4CI1                                 | 4CI2t                                | 4CI2s                                | 4CI3                                 | 4CI2b                          |
|------------|-------------------|--------------------------------------|--------------------------------------|--------------------------------------|--------------------------------------|--------------------------------------|--------------------------------|
|            | 1 <sup>1</sup> A' | 3 <sup>1</sup> A'/2 <sup>1</sup> A'' | 2 <sup>1</sup> A'/2 <sup>1</sup> A'' | 2 <sup>3</sup> A'/1 <sup>3</sup> A'' | 2 <sup>1</sup> A'/1 <sup>1</sup> A'' | 1 <sup>1</sup> A''/1 <sup>1</sup> A' | S <sub>3</sub> /S <sub>2</sub> |
| R2,1       | 1.421             | 1.348                                | 1.303                                | 1.334                                | 1.400                                | 1.422                                | 1.308                          |
| R3,2       | 1.398             | 1.439                                | 1.453                                | 1.430                                | 1.429                                | 1.406                                | 1.430                          |
| A3,2,1     | 115.451           | 115.475                              | 114.149                              | 114.630                              | 114.917                              | 110.852                              | 115.986                        |
| R4,2       | 1.384             | 1.447                                | 1.434                                | 1.423                                | 1.434                                | 1.370                                | 1.461                          |
| A4,2,1     | 125.422           | 126.224                              | 128.090                              | 127.263                              | 124.030                              | 129.916                              | 127.357                        |
| Dh4,2,1,3  | 180.000           | -180.000                             | 180.000                              | 180.000                              | -179.976                             | 180.000                              | 179.886                        |
| R5,3       | 1.379             | 1.409                                | 1.359                                | 1.371                                | 1.434                                | 1.381                                | 1.412                          |
| A5,3,2     | 120.420           | 119.534                              | 120.421                              | 120.689                              | 119.424                              | 120.177                              | 121.137                        |
| Dh5,3,2,4  | 0.000             | 0.000                                | -0.000                               | 0.000                                | -0.005                               | 0.001                                | 1.263                          |
| R6,4       | 1.399             | 1.413                                | 1.389                                | 1.387                                | 1.430                                | 1.412                                | 1.412                          |
| A6,4,2     | 120.581           | 121.153                              | 120.356                              | 120.470                              | 119.215                              | 120.460                              | 120.635                        |
| Dh6,4,2,3  | 0.000             | 0.000                                | 0.000                                | 0.000                                | 0.002                                | 0.000                                | -0.680                         |
| R7,5       | 1.399             | 1.424                                | 1.426                                | 1.412                                | 1.420                                | 1.398                                | 1.411                          |
| A7,5,4     | 60.498            | 59.665                               | 59.408                               | 59.594                               | 59.295                               | 60.871                               | 60.000                         |
| Dh7,5,4,2  | 180.000           | 180.000                              | 180.000                              | 180.000                              | -179.999                             | 180.000                              | -179.640                       |
| R8,7       | 1.351             | 1.350                                | 1.345                                | 1.344                                | 1.349                                | 1.360                                | 2.432                          |
| A8,7,5     | 115.844           | 114.995                              | 114.938                              | 115.373                              | 115.152                              | 115.676                              | 148.089                        |
| Dh8,7,5,6  | 180.000           | -180.000                             | 180.000                              | 180.000                              | 179.997                              | 180.000                              | -0.363                         |

(continue)

**Table S11.** (continuation)

| Coordinate  | <b>4M1<sup>c</sup></b> | <b>4CI0</b>                             | <b>4CI1</b>                             | <b>4CI2t</b>                            | <b>4CI2s</b>                            | <b>4CI3</b>                             | <b>4CI2b</b>                       |
|-------------|------------------------|-----------------------------------------|-----------------------------------------|-----------------------------------------|-----------------------------------------|-----------------------------------------|------------------------------------|
|             | <b>1<sup>1</sup>A'</b> | <b>3<sup>1</sup>A'/2<sup>1</sup>A''</b> | <b>2<sup>1</sup>A'/2<sup>1</sup>A''</b> | <b>2<sup>3</sup>A'/1<sup>3</sup>A''</b> | <b>2<sup>1</sup>A'/1<sup>1</sup>A''</b> | <b>1<sup>1</sup>A''/1<sup>1</sup>A'</b> | <b>S<sub>3</sub>/S<sub>2</sub></b> |
| R9,8        | 1.395                  | 1.399                                   | 1.402                                   | 1.402                                   | 1.400                                   | 1.395                                   | 1.400                              |
| A9,8,7      | 119.693                | 119.755                                 | 119.759                                 | 119.970                                 | 120.373                                 | 119.128                                 | 91.751                             |
| Dh9,8,7,5   | 180.000                | 180.000                                 | -180.000                                | 180.000                                 | -179.994                                | -180.000                                | -179.227                           |
| R10,3       | 1.072                  | 1.071                                   | 1.073                                   | 1.073                                   | 1.071                                   | 1.075                                   | 1.072                              |
| A10,3,2     | 119.038                | 119.299                                 | 118.175                                 | 118.297                                 | 119.266                                 | 120.136                                 | 118.287                            |
| Dh10,3,2,5  | 180.000                | -180.000                                | -180.000                                | 180.000                                 | 179.998                                 | 180.000                                 | 179.406                            |
| R11,4       | 1.073                  | 1.071                                   | 1.069                                   | 1.071                                   | 1.072                                   | 1.072                                   | 1.070                              |
| A11,4,2     | 121.007                | 120.153                                 | 119.733                                 | 119.700                                 | 121.302                                 | 121.328                                 | 119.838                            |
| Dh11,4,2,6  | 180.000                | -180.000                                | 180.000                                 | 180.000                                 | 179.997                                 | 180.000                                 | -179.570                           |
| R12,5       | 1.072                  | 1.073                                   | 1.074                                   | 1.073                                   | 1.071                                   | 1.074                                   | 1.073                              |
| A12,5,7     | 118.759                | 118.175                                 | 118.119                                 | 118.441                                 | 119.182                                 | 118.983                                 | 118.822                            |
| Dh12,5,7,3  | 180.000                | 180.000                                 | 180.000                                 | 180.000                                 | -180.000                                | 180.000                                 | 179.974                            |
| R13,6       | 1.070                  | 1.071                                   | 1.072                                   | 1.072                                   | 1.070                                   | 1.072                                   | 1.072                              |
| A13,6,7     | 121.340                | 121.765                                 | 120.868                                 | 120.931                                 | 121.288                                 | 121.524                                 | 121.046                            |
| Dh13,6,7,4  | 180.000                | 180.000                                 | -180.000                                | 180.000                                 | 180.000                                 | 180.000                                 | 179.787                            |
| R14,9       | 1.078                  | 1.080                                   | 1.080                                   | 1.080                                   | 1.080                                   | 1.081                                   | 1.080                              |
| A14,9,8     | 106.506                | 106.327                                 | 106.240                                 | 106.177                                 | 106.234                                 | 106.489                                 | 106.278                            |
| Dh14,9,8,7  | 180.000                | -180.000                                | -180.000                                | 180.000                                 | 179.997                                 | -180.000                                | 179.961                            |
| R15,9       | 1.085                  | 1.086                                   | 1.085                                   | 1.085                                   | 1.085                                   | 1.087                                   | 1.086                              |
| A15,9,8     | 111.561                | 111.428                                 | 111.261                                 | 111.292                                 | 111.484                                 | 111.523                                 | 111.377                            |
| Dh15,9,8,14 | -118.768               | -118.674                                | -118.703                                | -118.662                                | -118.599                                | -118.773                                | -118.684                           |
| R16,9       | 1.085                  | 1.086                                   | 1.085                                   | 1.085                                   | 1.085                                   | 1.087                                   | 1.086                              |
| A16,9,8     | 111.561                | 111.428                                 | 111.261                                 | 111.292                                 | 111.484                                 | 111.522                                 | 111.371                            |
| Dh16,9,8,14 | 118.768                | 118.674                                 | 118.703                                 | 118.662                                 | 118.599                                 | 118.773                                 | 118.663                            |
| R17,1       | 1.258                  | 1.509                                   | 1.637                                   | 1.558                                   | 1.252                                   | 1.998                                   | 1.458                              |
| A17,1,2     | 114.361                | 111.380                                 | 106.380                                 | 110.314                                 | 115.946                                 | 105.628                                 | 113.902                            |
| Dh17,1,2,3  | 180.000                | -179.998                                | 180.000                                 | 180.000                                 | 179.993                                 | 179.999                                 | -179.094                           |
| R18,17      | 1.115                  | 1.130                                   | 1.165                                   | 1.171                                   | 1.121                                   | 1.093                                   | 1.179                              |
| A18,17,1    | 173.605                | 176.836                                 | 168.849                                 | 179.139                                 | 173.881                                 | 163.649                                 | 130.596                            |
| Dh18,17,1,2 | 180.000                | -179.996                                | 180.000                                 | -179.998                                | 179.954                                 | -179.994                                | -82.293                            |

<sup>a</sup>Numbering for coordinate definition given in the molecular geometry on top of the table. <sup>b</sup>R: internuclear distance in Å; A: valence bond in degrees; Dh: dihedral angle in degrees.

<sup>c</sup>MP2/aug-cc-pVDZ S<sub>0</sub> minimum.



**Table S12.** CAS-SCF internal coordinates of the conical intersections on the potential energy surfaces of 3-methoxyphenyl azide.<sup>a</sup>

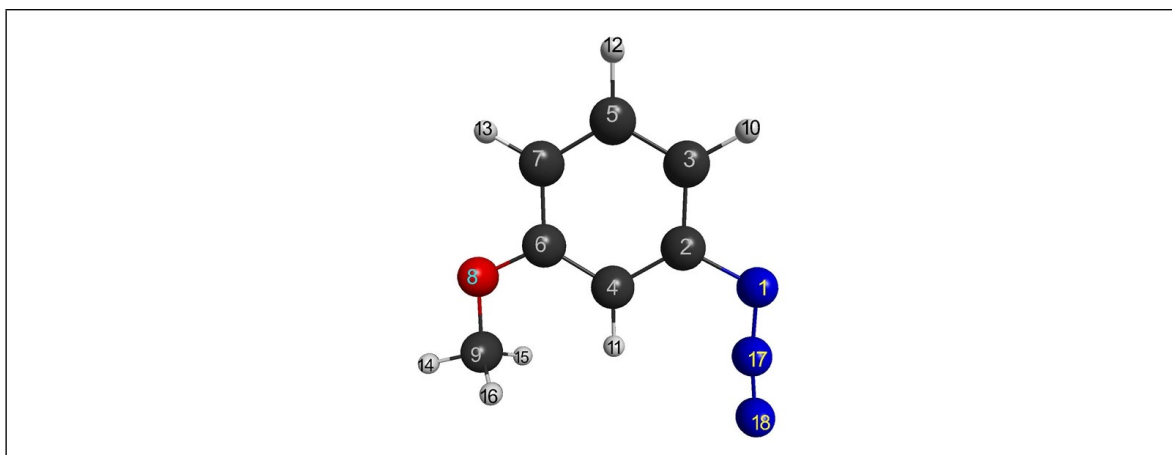

| Coordinate <sup>b</sup> | 3M1 <sup>c</sup>  |                                      | 3CI0                                 | 3CI1                                  | 3CI2''                               | 3CI2s                                | 3CI3                           | 3CI2b |
|-------------------------|-------------------|--------------------------------------|--------------------------------------|---------------------------------------|--------------------------------------|--------------------------------------|--------------------------------|-------|
|                         | 1 <sup>1</sup> A' | 2 <sup>1</sup> A'/2 <sup>1</sup> A'' | 2 <sup>1</sup> A'/2 <sup>1</sup> A'' | 2 <sup>3</sup> A''/1 <sup>3</sup> A'' | 2 <sup>1</sup> A'/1 <sup>1</sup> A'' | 1 <sup>1</sup> A''/1 <sup>1</sup> A' | S <sub>3</sub> /S <sub>2</sub> |       |
| R2,1                    | 1.433             | 1.314                                | 1.300                                | 1.333                                 | 1.400                                | 1.416                                | 1.307                          |       |
| R3,2                    | 1.404             | 1.435                                | 1.456                                | 1.425                                 | 1.435                                | 1.394                                | 1.443                          |       |
| A3,2,1                  | 116.262           | 118.233                              | 113.525                              | 114.105                               | 114.825                              | 111.194                              | 116.135                        |       |
| R4,2                    | 1.412             | 1.473                                | 1.440                                | 1.433                                 | 1.430                                | 1.385                                | 1.441                          |       |
| A4,2,1                  | 122.145           | 124.022                              | 127.544                              | 126.442                               | 124.068                              | 128.192                              | 126.488                        |       |
| Dh4,2,1,3               | 180.000           | 180.000                              | -180.000                             | 180.000                               | 180.000                              | 180.000                              | -179.803                       |       |
| R5,3                    | 1.407             | 1.390                                | 1.368                                | 1.383                                 | 1.430                                | 1.391                                | 1.399                          |       |
| A5,3,2                  | 118.562           | 119.358                              | 119.679                              | 119.857                               | 120.129                              | 118.948                              | 120.495                        |       |
| Dh5,3,2,4               | 0.000             | 0.000                                | -0.000                               | 0.000                                 | -0.000                               | -0.000                               | 0.532                          |       |
| R6,4                    | 1.409             | 1.413                                | 1.374                                | 1.372                                 | 1.436                                | 1.402                                | 1.413                          |       |
| A6,4,2                  | 118.773           | 120.629                              | 119.277                              | 119.314                               | 117.722                              | 119.360                              | 120.137                        |       |
| Dh6,4,2,3               | 0.000             | 0.000                                | 0.000                                | 0.000                                 | 0.000                                | -0.000                               | -0.242                         |       |
| R7,5                    | 1.403             | 1.437                                | 1.410                                | 1.395                                 | 1.428                                | 1.387                                | 1.399                          |       |
| A7,5,4                  | 60.296            | 60.165                               | 59.244                               | 59.341                                | 59.717                               | 60.833                               | 60.527                         |       |
| Dh7,5,4,2               | 180.000           | 180.000                              | 180.000                              | 180.000                               | -180.000                             | -180.000                             | -179.856                       |       |
| R8,6                    | 1.373             | 1.349                                | 1.346                                | 1.347                                 | 1.349                                | 1.356                                | 1.340                          |       |
| A8,6,4                  | 123.868           | 122.961                              | 124.177                              | 124.563                               | 123.167                              | 123.070                              | 123.032                        |       |
| Dh8,6,4,7               | 180.000           | 180.000                              | 180.000                              | 180.000                               | -180.000                             | 180.000                              | -179.945                       |       |

(continue)

**Table S12.** (continuation)

| Coordinate <sup>b</sup> | <b>3M1<sup>c</sup></b> | <b>3CI0</b>                             | <b>3CI1</b>                             | <b>3CI2t</b>                             | <b>3CI2s</b>                            | <b>3CI3</b>                             | <b>3CI2b</b>                       |
|-------------------------|------------------------|-----------------------------------------|-----------------------------------------|------------------------------------------|-----------------------------------------|-----------------------------------------|------------------------------------|
|                         | <b>1<sup>1</sup>A'</b> | <b>2<sup>1</sup>A'/2<sup>1</sup>A''</b> | <b>2<sup>1</sup>A''/2<sup>1</sup>A'</b> | <b>2<sup>3</sup>A''/1<sup>3</sup>A''</b> | <b>2<sup>1</sup>A'/1<sup>1</sup>A''</b> | <b>1<sup>1</sup>A''/1<sup>1</sup>A'</b> | <b>S<sub>3</sub>/S<sub>2</sub></b> |
| R9,8                    | 1.433                  | 1.401                                   | 1.403                                   | 1.403                                    | 1.400                                   | 1.397                                   | 1.405                              |
| A9,8,6                  | 116.293                | 120.509                                 | 119.858                                 | 119.683                                  | 120.440                                 | 120.307                                 | 120.766                            |
| Dh9,8,6,4               | 0.000                  | 0.000                                   | 0.000                                   | 0.000                                    | -0.000                                  | 0.002                                   | 0.572                              |
| R10,3                   | 1.092                  | 1.072                                   | 1.073                                   | 1.073                                    | 1.072                                   | 1.075                                   | 1.072                              |
| A10,3,2                 | 119.564                | 119.046                                 | 118.150                                 | 118.431                                  | 118.607                                 | 120.501                                 | 118.156                            |
| Dh10,3,2,5              | 180.000                | 180.000                                 | -180.000                                | 180.000                                  | 180.000                                 | -180.000                                | 179.815                            |
| R11,4                   | 1.092                  | 1.069                                   | 1.067                                   | 1.068                                    | 1.069                                   | 1.069                                   | 1.068                              |
| A11,4,2                 | 119.747                | 118.561                                 | 118.948                                 | 118.880                                  | 121.046                                 | 120.389                                 | 119.073                            |
| Dh11,4,2,6              | 180.000                | 180.000                                 | 180.000                                 | 180.000                                  | 180.000                                 | -180.000                                | -179.717                           |
| R12,5                   | 1.094                  | 1.074                                   | 1.074                                   | 1.074                                    | 1.072                                   | 1.075                                   | 1.074                              |
| A12,5,7                 | 119.426                | 118.352                                 | 119.296                                 | 119.632                                  | 120.507                                 | 119.662                                 | 119.440                            |
| Dh12,5,7,3              | 180.000                | 180.000                                 | -180.000                                | 180.000                                  | 180.000                                 | -180.000                                | 179.827                            |
| R13,7                   | 1.093                  | 1.071                                   | 1.072                                   | 1.073                                    | 1.072                                   | 2.127                                   | 1.072                              |
| A13,7,5                 | 121.602                | 121.070                                 | 121.528                                 | 121.487                                  | 121.568                                 | 26.085                                  | 119.062                            |
| Dh13,7,5,6              | 180.000                | 180.000                                 | 180.000                                 | 180.000                                  | -180.000                                | -180.000                                | 179.854                            |
| R14,9                   | 1.096                  | 1.080                                   | 1.080                                   | 1.080                                    | 1.080                                   | 1.081                                   | 1.080                              |
| A14,9,8                 | 105.527                | 106.116                                 | 106.162                                 | 106.167                                  | 106.223                                 | 106.305                                 | 105.951                            |
| Dh14,9,8,6              | 180.000                | 180.000                                 | -180.000                                | 180.000                                  | -180.000                                | 179.999                                 | 179.524                            |
| R15,9                   | 1.103                  | 1.086                                   | 1.085                                   | 1.084                                    | 1.085                                   | 1.086                                   | 1.085                              |
| A15,9,8                 | 110.968                | 111.491                                 | 111.278                                 | 111.435                                  | 111.487                                 | 111.617                                 | 111.284                            |
| Dh15,9,8,14             | 118.760                | 118.526                                 | 118.707                                 | 118.886                                  | 118.560                                 | 118.570                                 | 118.544                            |
| R16,9                   | 1.103                  | 1.086                                   | 1.085                                   | 1.084                                    | 1.085                                   | 1.086                                   | 1.084                              |
| A16,9,8                 | 110.968                | 111.491                                 | 111.278                                 | 111.435                                  | 111.487                                 | 111.617                                 | 111.305                            |
| Dh16,9,8,14             | -118.760               | -118.526                                | -118.707                                | -118.886                                 | -118.559                                | -118.570                                | -118.602                           |
| R17,1                   | 1.249                  | 1.396                                   | 1.624                                   | 1.559                                    | 1.250                                   | 1.993                                   | 1.447                              |
| A17,1,2                 | 116.036                | 113.074                                 | 107.177                                 | 110.576                                  | 115.913                                 | 106.569                                 | 113.096                            |
| Dh17,1,2,3              | 180.000                | 180.000                                 | 180.000                                 | 180.000                                  | -180.000                                | -180.000                                | -179.050                           |
| R18,17                  | 1.166                  | 1.159                                   | 1.164                                   | 1.171                                    | 1.122                                   | 1.093                                   | 1.179                              |
| A18,17,1                | 173.061                | 156.926                                 | 169.395                                 | 179.116                                  | 174.378                                 | 163.046                                 | 133.842                            |
| Dh18,17,1,2             | 180.000                | 180.000                                 | 180.000                                 | 180.000                                  | 179.993                                 | 180.000                                 | -91.215                            |

<sup>a</sup>Numbering for coordinate definition given in the molecular geometry on top of the table. <sup>b</sup>R: internuclear distance in Å; A: valence bond in degrees; Dh: dihedral angle in degrees.

<sup>c</sup>MP2/aug-cc-pVDZ S<sub>0</sub> minimum.

**Table S13.** CAS-SCF internal coordinates of the minimum energy intersystem crossings on the potential energy surfaces of 4-methoxyphenyl azide.<sup>a</sup>

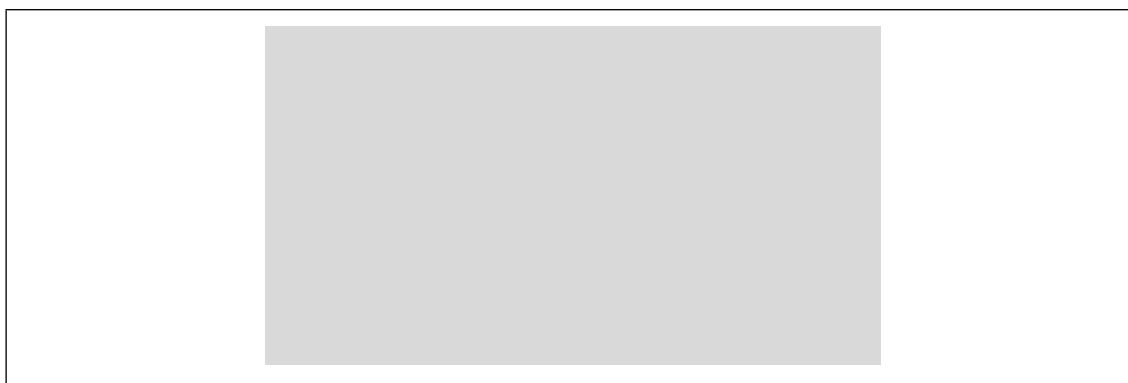

| Coordinate <sup>b</sup> | <b>4ISC0</b>                           | <b>4ISC1</b>                           | <b>4ISC2</b>                           | <b>4ISC3</b>                           |
|-------------------------|----------------------------------------|----------------------------------------|----------------------------------------|----------------------------------------|
|                         | <b>3<sup>1</sup>A'/2<sup>3</sup>A"</b> | <b>2<sup>1</sup>A'/2<sup>3</sup>A"</b> | <b>1<sup>1</sup>A'/1<sup>3</sup>A"</b> | <b>2<sup>1</sup>A'/1<sup>3</sup>A"</b> |
| R2,1                    | 1.331                                  | 1.300                                  | 1.401                                  | 1.406                                  |
| R3,2                    | 1.439                                  | 1.452                                  | 1.409                                  | 1.435                                  |
| A3,2,1                  | 116.612                                | 114.500                                | 112.692                                | 114.361                                |
| R4,2                    | 1.449                                  | 1.433                                  | 1.387                                  | 1.427                                  |
| A4,2,1                  | 125.702                                | 127.847                                | 129.060                                | 123.979                                |
| Dh4,2,1,3               | 180.000                                | 180.000                                | 180.000                                | 180.000                                |
| R5,3                    | 1.395                                  | 1.358                                  | 1.379                                  | 1.442                                  |
| A5,3,2                  | 119.500                                | 120.594                                | 120.738                                | 119.039                                |
| Dh5,3,2,4               | 0.000                                  | 0.000                                  | 0.000                                  | 0.000                                  |
| R6,4                    | 1.406                                  | 1.391                                  | 1.402                                  | 1.436                                  |
| A6,4,2                  | 121.504                                | 120.126                                | 120.887                                | 119.092                                |
| Dh6,4,2,3               | 0.000                                  | 0.000                                  | 0.000                                  | 0.000                                  |
| R7,5                    | 1.425                                  | 1.422                                  | 1.399                                  | 1.415                                  |
| A7,5,4                  | 59.801                                 | 59.622                                 | 60.717                                 | 59.331                                 |
| Dh7,5,4,2               | 180.000                                | 180.000                                | 180.000                                | 180.000                                |
| R8,7                    | 1.346                                  | 1.343                                  | 1.355                                  | 1.343                                  |
| A8,7,5                  | 114.992                                | 115.196                                | 115.941                                | 115.516                                |
| Dh8,7,5,6               | 180.000                                | 180.000                                | 180.000                                | 180.000                                |

(continue)

**Table S13.** (continuation)

| Coordinate  | 4ISC0                               | 4ISC1                               | 4ISC2                               | 4ISC3                               |
|-------------|-------------------------------------|-------------------------------------|-------------------------------------|-------------------------------------|
|             | 3 <sup>1</sup> A'/2 <sup>3</sup> A" | 2 <sup>1</sup> A'/2 <sup>3</sup> A" | 1 <sup>1</sup> A'/1 <sup>3</sup> A" | 2 <sup>1</sup> A'/1 <sup>3</sup> A" |
| R9,8        | 1.396                               | 1.398                               | 1.393                               | 1.397                               |
| A9,8,7      | 119.797                             | 119.916                             | 119.437                             | 120.966                             |
| Dh9,8,7,5   | 180.000                             | 180.000                             | 180.000                             | 180.000                             |
| R10,3       | 1.069                               | 1.071                               | 1.073                               | 1.068                               |
| A10,3,2     | 119.273                             | 118.117                             | 119.382                             | 119.285                             |
| Dh10,3,2,5  | 180.000                             | 180.000                             | 180.000                             | 180.000                             |
| R11,4       | 1.069                               | 1.066                               | 1.071                               | 1.070                               |
| A11,4,2     | 119.784                             | 119.910                             | 120.989                             | 121.529                             |
| Dh11,4,2,6  | 180.000                             | 180.000                             | 180.000                             | 180.000                             |
| R12,5       | 1.071                               | 1.072                               | 1.072                               | 1.069                               |
| A12,5,7     | 117.807                             | 118.217                             | 118.853                             | 119.210                             |
| Dh12,5,7,3  | 180.000                             | 180.000                             | 180.000                             | 180.000                             |
| R13,6       | 1.069                               | 1.070                               | 1.070                               | 1.067                               |
| A13,6,7     | 121.761                             | 120.640                             | 121.312                             | 121.311                             |
| Dh13,6,7,4  | 180.000                             | 180.000                             | 180.000                             | 180.000                             |
| R14,9       | 1.078                               | 1.078                               | 1.079                               | 1.078                               |
| A14,9,8     | 106.462                             | 106.376                             | 106.591                             | 106.276                             |
| Dh14,9,8,7  | 180.000                             | 180.000                             | 180.000                             | 180.000                             |
| R15,9       | 1.084                               | 1.084                               | 1.085                               | 1.083                               |
| A15,9,8     | 111.454                             | 111.359                             | 111.617                             | 111.572                             |
| Dh15,9,8,14 | -118.765                            | -118.766                            | -118.795                            | -118.599                            |
| R16,9       | 1.084                               | 1.084                               | 1.085                               | 1.083                               |
| A16,9,8     | 111.454                             | 111.359                             | 111.617                             | 111.572                             |
| Dh16,9,8,14 | 118.765                             | 118.766                             | 118.795                             | 118.599                             |
| R17,1       | 1.477                               | 1.594                               | 1.724                               | 1.245                               |
| A17,1,2     | 111.943                             | 106.692                             | 107.323                             | 115.657                             |
| Dh17,1,2,3  | 180.000                             | 180.000                             | 180.000                             | 180.000                             |
| R18,17      | 1.137                               | 1.160                               | 1.095                               | 1.103                               |
| A18,17,1    | 176.291                             | 171.540                             | 155.749                             | 175.600                             |
| Dh18,17,1,2 | 180.000                             | 180.000                             | 180.000                             | 180.000                             |

<sup>a</sup>Numbering for coordinate definition given in the molecular geometry. <sup>b</sup>R: internuclear distance in Å; A: valence bond in degrees; Dh: dihedral angle in degrees.

**Table S14.** CAS-SCF internal coordinates of the minimum energy intersystem crossings on the potential energy surfaces of 3-methoxyphenyl azide.<sup>a</sup>

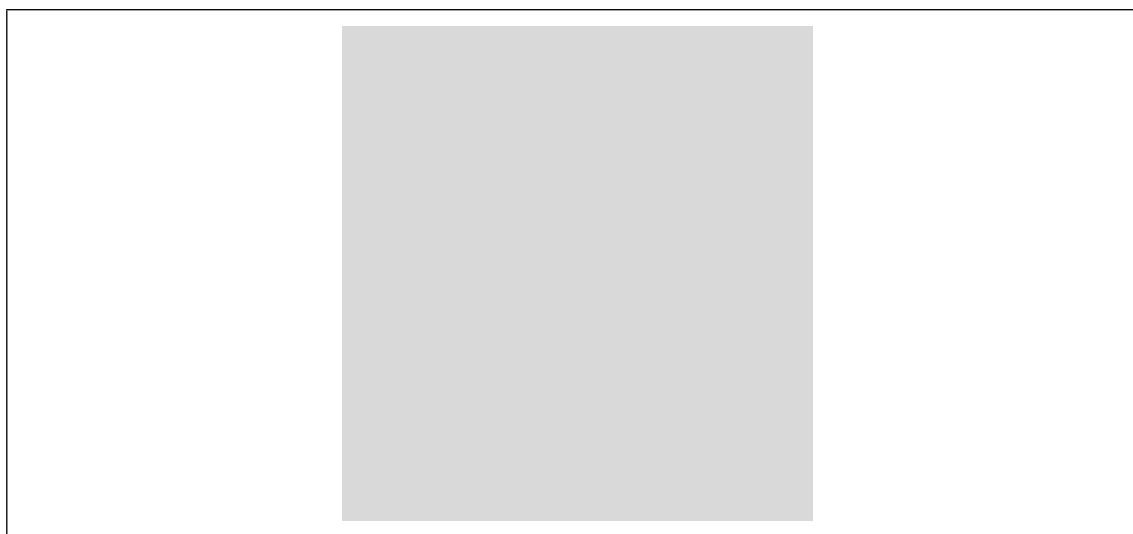

| Coordinate <sup>b</sup> | <b>3M1</b>             | <b>3ISC0</b>                            | <b>3ISC1</b>                            | <b>3ISC2</b>                            | <b>3ISC3</b>                            |
|-------------------------|------------------------|-----------------------------------------|-----------------------------------------|-----------------------------------------|-----------------------------------------|
|                         | <b>1<sup>1</sup>A'</b> | <b>3<sup>1</sup>A'/2<sup>3</sup>A''</b> | <b>2<sup>1</sup>A'/2<sup>3</sup>A''</b> | <b>1<sup>1</sup>A'/1<sup>3</sup>A''</b> | <b>2<sup>1</sup>A'/1<sup>3</sup>A''</b> |
| R2,1                    | 1.420                  | 1.312                                   | 1.296                                   | 1.397                                   | 1.409                                   |
| R3,2                    | 1.386                  | 1.439                                   | 1.458                                   | 1.399                                   | 1.430                                   |
| A3,2,1                  | 115.516                | 118.343                                 | 113.866                                 | 112.636                                 | 114.757                                 |
| R4,2                    | 1.399                  | 1.467                                   | 1.437                                   | 1.400                                   | 1.435                                   |
| A4,2,1                  | 123.979                | 123.765                                 | 127.327                                 | 127.706                                 | 123.936                                 |
| Dh4,2,1,3               | 180.000                | 180.000                                 | 180.000                                 | 180.000                                 | 180.000                                 |
| R5,3                    | 1.392                  | 1.384                                   | 1.366                                   | 1.389                                   | 1.441                                   |
| A5,3,2                  | 119.294                | 119.113                                 | 119.754                                 | 119.535                                 | 120.563                                 |
| Dh5,3,2,4               | 0.000                  | 0.000                                   | 0.000                                   | 0.000                                   | 0.000                                   |
| R6,4                    | 1.389                  | 1.407                                   | 1.378                                   | 1.392                                   | 1.446                                   |
| A6,4,2                  | 119.504                | 120.733                                 | 119.205                                 | 119.823                                 | 117.290                                 |
| Dh6,4,2,3               | 0.000                  | 0.000                                   | 0.000                                   | 0.000                                   | 0.000                                   |
| R7,5                    | 1.384                  | 1.434                                   | 1.409                                   | 1.387                                   | 1.436                                   |
| A7,5,4                  | 60.354                 | 60.101                                  | 59.348                                  | 60.581                                  | 59.603                                  |
| Dh7,5,4,2               | 180.000                | 180.000                                 | 180.000                                 | 180.000                                 | 180.000                                 |
| R8,6                    | 1.350                  | 1.345                                   | 1.342                                   | 1.352                                   | 1.342                                   |
| A8,6,4                  | 123.907                | 123.152                                 | 123.856                                 | 123.519                                 | 122.730                                 |
| Dh8,6,4,7               | 180.000                | 180.000                                 | 180.000                                 | 180.000                                 | 180.000                                 |

(continue)

**Table S14.** (continuation)

| Coordinate  | <b>3M1</b>             | <b>3ISC0</b>                            | <b>3ISC1</b>                            | <b>3ISC2</b>                            | <b>3ISC3</b>                            |
|-------------|------------------------|-----------------------------------------|-----------------------------------------|-----------------------------------------|-----------------------------------------|
|             | <b>1<sup>1</sup>A'</b> | <b>3<sup>1</sup>A'/2<sup>3</sup>A''</b> | <b>2<sup>1</sup>A'/2<sup>3</sup>A''</b> | <b>1<sup>1</sup>A'/1<sup>3</sup>A''</b> | <b>2<sup>1</sup>A'/1<sup>3</sup>A''</b> |
| R9,8        | 1.395                  | 1.398                                   | 1.400                                   | 1.393                                   | 1.398                                   |
| A9,8,6      | 120.202                | 120.630                                 | 120.194                                 | 120.328                                 | 121.004                                 |
| Dh9,8,6,4   | 0.000                  | 0.000                                   | 0.000                                   | 0.000                                   | 0.000                                   |
| R10,3       | 1.071                  | 1.070                                   | 1.070                                   | 1.072                                   | 1.070                                   |
| A10,3,2     | 119.410                | 119.158                                 | 118.100                                 | 119.752                                 | 118.434                                 |
| Dh10,3,2,5  | 180.000                | 180.000                                 | 180.000                                 | 180.000                                 | 180.000                                 |
| R11,4       | 1.070                  | 1.067                                   | 1.064                                   | 1.068                                   | 1.066                                   |
| A11,4,2     | 120.168                | 118.571                                 | 119.104                                 | 120.130                                 | 121.542                                 |
| Dh11,4,2,6  | 180.000                | 180.000                                 | 180.000                                 | 180.000                                 | 180.000                                 |
| R12,5       | 1.072                  | 1.072                                   | 1.072                                   | 1.073                                   | 1.068                                   |
| A12,5,7     | 119.582                | 118.218                                 | 119.329                                 | 119.574                                 | 120.891                                 |
| Dh12,5,7,3  | 180.000                | 180.000                                 | 180.000                                 | 180.000                                 | 180.000                                 |
| R13,7       | 1.072                  | 1.069                                   | 1.070                                   | 1.071                                   | 1.069                                   |
| A13,7,5     | 121.515                | 121.025                                 | 121.508                                 | 121.649                                 | 121.562                                 |
| Dh13,7,5,6  | 180.000                | 180.000                                 | 180.000                                 | 180.000                                 | 180.000                                 |
| R14,9       | 1.078                  | 1.078                                   | 1.078                                   | 1.078                                   | 1.078                                   |
| A14,9,8     | 106.423                | 106.275                                 | 106.246                                 | 106.470                                 | 106.273                                 |
| Dh14,9,8,7  | 180.000                | 180.000                                 | 180.000                                 | 180.000                                 | 180.000                                 |
| R15,9       | 1.084                  | 1.084                                   | 1.083                                   | 1.085                                   | 1.083                                   |
| A15,9,8     | 111.582                | 111.557                                 | 111.370                                 | 111.665                                 | 111.553                                 |
| Dh15,9,8,14 | 118.691                | 118.605                                 | 118.748                                 | 118.663                                 | 118.567                                 |
| R16,9       | 1.084                  | 1.084                                   | 1.083                                   | 1.085                                   | 1.083                                   |
| A16,9,8     | 111.582                | 111.557                                 | 111.370                                 | 111.665                                 | 111.553                                 |
| Dh16,9,8,14 | -118.691               | -118.605                                | -118.748                                | -118.663                                | -118.567                                |
| R17,1       | 1.258                  | 1.400                                   | 1.577                                   | 1.731                                   | 1.241                                   |
| A17,1,2     | 114.670                | 113.251                                 | 107.712                                 | 107.813                                 | 115.477                                 |
| Dh17,1,2,3  | 180.000                | 180.000                                 | 180.000                                 | 180.000                                 | 180.000                                 |
| R18,17      | 1.115                  | 1.152                                   | 1.158                                   | 1.095                                   | 1.103                                   |
| A18,17,1    | 173.438                | 159.338                                 | 172.747                                 | 156.050                                 | 175.843                                 |
| Dh18,17,1,2 | 180.000                | 180.000                                 | 180.000                                 | 180.000                                 | 180.000                                 |

<sup>a</sup>Numbering for coordinate definition given in the molecular geometry. <sup>b</sup>R: internuclear distance in Å; A: valence bond in degrees; Dh: dihedral angle in degrees.

**Table S15.** Relative energies (eV) of the critical points (conical intersections and intersystem crossings) in the photochemistry of 3- and 4-methoxyphenyl azide ( $C_s$ , MS-CASPT2 IPEA=0.25 and IPEA=0.0 a.u).<sup>a</sup>

| Geometry | $\Delta E^b$ | $\Delta E^c$ | Geometry | $\Delta E^b$ | $\Delta E^c$ | Assign.         |
|----------|--------------|--------------|----------|--------------|--------------|-----------------|
| 3ISC0    | 5.33         | 4.96         | 4ISC0    | 5.29         | 4.93         | $3^1A'/2^3A''$  |
| 3ISC1    | 4.65         | 4.37         | 4ISC1    | 4.60         | 4.29         | $2^1A'/2^3A''$  |
| 3ISC2    | 1.99         | 1.87         | 4ISC2    | 1.97         | 1.83         | $1^1A'/1^3A''$  |
| 3ISC3    | 4.50         | 4.16         | 4ISC3    | 4.37         | 4.04         | $2^1A'/1^3A''$  |
| 3CI0     | 5.22         | 4.86         | 4CI0     | 5.44         | 5.09         | $3^1A'/2^1A''$  |
| 3CI1     | 4.80         | 4.51         | 4CI1     | 4.74         | 4.41         | $2^1A'/2^1A''$  |
| 3CI2t    | 4.20         | 3.93         | 4CI2t    | 4.11         | 3.83         | $2^3A''/1^3A''$ |
| 3CI2s    | 4.47         | 3.97         | 4CI2s    | 4.21         | 3.85         | $2^1A'/1^1A''$  |
| 3CI3     | 2.23         | 2.08         | 4CI3     | 2.22         | 2.06         | $1^1A'/1^1A''$  |
| 3CI2b    | 4.25         | 3.95         | 4CI2b    | 4.43         | 4.04         | $S_3/S_2$       |

<sup>a</sup>MS-CASPT2/ANO-RCC ANO-RCC[4s3p2d1f/3s2p1d]; optimized geometries: SA-CASSCF ANO-RCC[3s2p1d/2s1p]. <sup>b</sup>IPEA=0.25 a. u. <sup>c</sup>IPEA=0.0 a.u. Reference geometry: Ground state of the respective azide optimized at the MP2/aug-cc-pVDZ level.
